# Supplementary material for: FLARE: a label-free fluorescence-assisted method for RNA engineering of three-way junctions
Source: Royal Society of Chemistry journal article supplement (doi:10.1039/d5ob01756d), 2025-11-26
Supplement: d5ob01756d1.pdf [file d5ob01756d1.pdf]

**FLARE: A label-free FLuorescence Assisted method for RNA Engineering  
of three-way junctions**

A. Murali Krishna<sup>a</sup>, Nida Fathima<sup>a</sup>, Jothi Basu<sup>b</sup> and Ashwani Sharma<sup>a,b\*</sup>

<sup>a</sup>Department of Chemistry, Indian Institute of Science Education and Research (IISER),  
Tirupati 517619, India. E-mail: a.sharma@iisertirupati.ac.in

<sup>b</sup>Department of Biology, Indian Institute of Science Education and Research (IISER),  
Tirupati 517619, India

Keywords: Light-up aptamer, Three-way junction, RNA engineering,

| <b>Table of Content</b>                                                                           | <b>Page No.</b> |
|---------------------------------------------------------------------------------------------------|-----------------|
| Materials and methods                                                                             | 3               |
| Sequences of different RNA used                                                                   | 6               |
| Figure S1: Assessing FLARE functionality for upper strand U-bulge deleted (Udel) 3WJ.             | 12              |
| Figure S2: Thermal melting curves of wild-type and engineered phi29 3WJ                           | 13              |
| Figure S3: Step-wise assembly of wild-type and engineered 3WJ's                                   | 13              |
| Figure S4: Temperature dependent CD spectra of Phi29 3WJ, 5S rRNA 3WJ and engineered 5S Mod 2 3WJ | 14              |
| Figure S5: Thermal melting curves of engineered Phi29 3WJ and engineered 5S rRNA 3WJ              | 15              |
| Table 1: Head-to-head comparison of Fluorescence fold vs UV-T <sub>m</sub> of selected 3WJs       | 16              |
| Figure S6: 8M and 10M urea stability of wild-type and engineered 3WJ's                            | 17              |
| Figure S7: Secondary structure prediction and thermodynamic parameters of WT sgRNA and 5S sgRNA   | 18              |
| Figure S8: To determine hydrodynamic size of the engineered 5S triangle.                          | 19              |
| Figure S9: To calculate loading efficiency of doxorubicin on the engineered 5S triangle           | 19              |
| Figure S10: Schematic representation 5S sgRNA                                                     | 20              |
| Figure S11: Schematic representation of engineered 5S triangle                                    | 20              |

## **Materials and methods**

All the DNA sequences were either ordered as single stranded DNA from Sigma or synthesised by K&A H6 DNA/RNA synthesizer. Oligonucleotides were dissolved at 100  $\mu$ M stock concentration in autoclaved Milli-Q water. The oligonucleotide stocks were stored at -80° C for long-term storage. dNTPs (DNTP100), Taq DNA Polymerase (D4545) and DFHBI (SML1627) were purchased from Sigma. MinElute PCR Purification Kit was purchased from QIAGEN (28006). In vitro transcription was carried out using Ampliscribe T7 High Yield Transcription Kit (AS3107, Lucigen) and for 2'F modified RNA transcription was carried out using DuraScribe transcription kit (DS010925). For cleavage assay Cas9 was purchased from Sigma (CAS9PROT), target eGFP dsDNA was PCR amplified from plasmid PX552 purchased from addgene (#60958). For cell viability doxorubicin was purchased from Hi-Media (TC420) and for confocal image cell mask was purchased from Thermo fisher scientific (C37608), DAPI was purchased from sigma (D9542). All RNAs were dissolved or resuspended in DEPC (D5758) treated water.

### **In vitro transcription of RNA**

PCR amplified dsDNA containing T7 Promoter sequence were used as template for in-vitro transcription to synthesize RNA using Ampliscribe T7 high yield transcription kit following kit protocol. To assess the size and purity, transcription products were resolved on a denaturing polyacrylamide gel electrophoresis on an 8% gel containing 8M urea. Desired bands were excised using UV-shadowing for visualization, and purified by crush and soak method or using RNA purification columns. The concentration was determined using Nanodrop spectrophotometer.

### **Fluorescence Measurements**

The samples for fluorescence measurements were prepared in 1 X FLARE buffer composed of 10 mM Tris, 100 mM KCl, 10 mM MgCl<sub>2</sub>, pH 7.2. Individual reactions were assembled using 0.25  $\mu$ M of respective RNAs and 2.5  $\mu$ M of DFHBI in 1 X FLARE buffer. The reactions were incubated at RT for 30 minutes followed by fluorescence measurements using a multi-mode microplate reader (BioTek Synergy H1). Fluorescence excitation was carried out at 450 nm, and fluorescence emission was recorded at 505 nm. All measurements were performed in triplicate to ensure reproducibility of the data.

### **Assembly and UV-Melting analysis of three-way junction (3WJ) RNA Constructs**

Three-way junction (3WJ) RNA constructs were assembled by annealing equimolar concentrations (5  $\mu$ M) of each of the three oligonucleotide strands. The samples were subjected to initial denaturation at 95 °C for 5 minutes, followed by a gradual cooling phase at a rate of 1 °C per minute until ambient temperature (25 °C) was reached, for optimal hybridization and formation of the 3WJ structure. The 3WJ assembly was checked using polyacrylamide gel electrophoresis on an 12% gel. Thermal stability of the annealed 3WJ constructs (5  $\mu$ M) were assessed using UV-thermal melting analysis using Agilent Cary 3500 UV-Vis Multicell Peltier spectrophotometer. Absorbance at 260 nm was monitored as a function of temperature using a controlled heating ramp from 20 °C to 90 °C at a uniform rate of 1 °C per minute. The resulting melting profiles were plotted using origin software, with temperature (°C) represented on the y-axis and absorbance at 260 nm on the x-axis.

## CD-Melting analysis of three-way junction (3WJ) RNA Constructs

Circular dichroism (CD) spectra and thermal melting studies were done on a JASCO J-1500 CD spectrometer equipped with a Peltier temperature controller. The 3WJ RNA constructs (5  $\mu$ M) were used for CD spectra and CD-melting studies. CD spectra were measured from 200nm to 350 nm at a scan speed of 100nm/min with a 1 nm bandwidth, 1s response time, and 1 nm data interval. Thermal melting studies were monitored at 270 nm (ellipticity) with a temperature ramp rate of at 1  $^{\circ}$ C/min over a range of 20  $^{\circ}$ C to 90  $^{\circ}$ C with continuous data collection every 1  $^{\circ}$ C. The resulting melting profiles were plotted using origin software.

## In Vitro eGFP DNA Cleavage Assay using CRISPR-Cas9 system

In vitro cleavage assay was performed in a total reaction volume of 10  $\mu$ L. The reaction mixture consisted of 1 X cleavage buffer (20 mM HEPES, 100 mM NaCl, 5 mM MgCl<sub>2</sub>, 0.1 mM EDTA, pH 6.5), 100 nM Cas9 protein, 100 nM of either wild type sgRNA or engineered 5S sgRNA, and incubated at 25  $^{\circ}$ C for 10 minutes to allow Cas9-sgRNA complex formation. Subsequently, 20 nM of target eGFP DNA was added to the reaction mixture, and the mixture was incubated at 37  $^{\circ}$ C for 2 h. The reaction was terminated by the addition of 1  $\mu$ L proteinase K, followed by incubation at 56  $^{\circ}$ C for 10 minutes. Cleavage products were resolved via agarose gel electrophoresis, and DNA band intensities were quantified using the Amersham Typhoon ImageQuant imaging system software.

$$\text{Cleavage efficiency (\%)} = \frac{\text{Intensities of cleaved products}}{\text{Intensities of cleaved products} + \text{uncleaved product}}$$

## Construction of engineered 5S triangle

Engineered 5S triangle was assembled by annealing equimolar concentration (1  $\mu$ M) of each of 2' F modified RNA strands. For hybridization and formation of the engineered 5S triangle the 2' F modified RNA strands were subjected to initial denaturation at 95  $^{\circ}$ C for 5 minutes, followed by a gradual cooling phase at a rate of 1  $^{\circ}$ C per minute until 12  $^{\circ}$ C was reached. The formation of triangle was checked using agarose gel electrophoresis on 1.5% gel.

## Cell Viability assay

A549 and HeLa cancer cell lines were seeded into 96-well plates. Cells were incubated at 37  $^{\circ}$ C with 5% CO<sub>2</sub> until 80% confluency was reached. Cells were gently washed with phosphate-buffered saline (PBS) to remove residual media and unattached cells. Actively proliferating cells were then treated with either free doxorubicin or doxorubicin-loaded engineered 5S triangle that was assembled using 2  $\mu$ M Dox and 100 nM of engineered 5S triangle and incubating for 15 mins. Untreated cells and cells treated with only the engineered 5S triangle were used as controls.

Following treatment, cells were incubated for 24 hours at 37  $^{\circ}$ C with 5% CO<sub>2</sub>. After incubation cells were treated by adding MTT solution (3-(4,5-dimethylthiazol-2-yl)-2,5-diphenyl tetrazolium bromide) at a final concentration of 0.5 mg/mL to each well. Cells were incubated for an additional 4 hours at 37  $^{\circ}$ C to allow the formation of insoluble purple formazan crystals. After incubation, the medium was carefully aspirated without disturbing the formazan crystals. Dimethyl sulfoxide (DMSO) was then added to each well to solubilize the crystals. Absorbance was measured at 570 nm using a microplate reader. All experiments were performed in triplicate to ensure reproducibility and statistical significance.

## **Confocal Microscopy Imaging**

Confocal images were taken using Leica TCS SP8 laser scanning confocal microscope equipped with a 40 X oil immersion objective. A549 cancer cells were seeded in 12-well plates with cover slip and cultured until 80% confluency was reached. The cells were then treated with doxorubicin-loaded engineered 5S triangle and incubated for 6 h. Cells were gently washed with phosphate-buffered saline (PBS), and were stained with CellMask™ membrane dye, and incubated further for 90 minutes. The cells were gently washed with phosphate-buffered saline (PBS), and cells were fixed using 4% paraformaldehyde and counterstained with DAPI to visualize nuclei. Images were recorded by excitation at 408 nm for DAPI, 488 for doxorubicin and 633 for CellMask. The respective emission wavelength ranges were 430-480 for DAPI, 580-620 for doxorubicin and 650-680 for CellMask. Acquired images were processed and analyzed using ImageJ software.

## Sequences of different RNA used:

| FLARE constructs used for optimization |                                                                                             |
|----------------------------------------|---------------------------------------------------------------------------------------------|
| <b>Main strands of FLARE:</b>          |                                                                                             |
| FLARE 1                                | CCCACAUACUUUGUUGAUGGUCAAGGACGGGUCCAGUAGUUCGCUACUGUUGGUA<br>GAGUGUGAGGUCCAUCAUCAUGGCAA       |
| FLARE 2                                | CCCACAUACUUUGUUGAUGGUCAAGGACGGGUCCAGUAGUUCGCUACUGCCUAGUAGA<br>GUGUGAGGUCCAUCAUCAUGGCAA      |
| FLARE 3                                | CCCACAUACUUUGUUGAAAGGACGGGUCAGUAGUUCGCUACUGUUGAGUAGAGUG<br>UGAGUCAUCAUGGCAA                 |
| FLARE 4                                | UCAGCCCACAUACUUUGUUGAAAGGACGGGUCAGUAGUUCGCUACUGUUGAGUAG<br>AGUGUGAGUCAUCAUGGCAAGUGC         |
| FLARE 5                                | GCAGUCAGCCCACAUACUUUGUUGAAAGGACGGGUCAGUAGUUCGCUACUGUUGA<br>GUAGAGUGUGAGUCAUCAUGGCAAGUGCUUGG |
| FLARE 6                                | Strand 1: CCCACAUACUUUGUUGAUGGUCAAGGACGGGUCCAGU                                             |
|                                        | Strand 2: ACUACUGUUGGUAGAGUGUGAGGUCCAUCAUCAUGGCAA                                           |
| FLARE 7                                | Strand 1: GCAGUCAGCCCACAUACUUUGUUGAUGGUCAAGGACGGGUCCAGU                                     |
|                                        | Strand 2: ACUACUGUUGGUAGAGUGUGAGGUCCAUCAUCAUGGCAA                                           |
| FLARE 8                                | Strand 1: GGACCCACAUACUUUGUUGAUGGUCAAGGACGGGUCCAGUAG                                        |
|                                        | Strand 2: CUACUGUUGGUAGAGUGUGAGGUCCAUCAUCAUGGCAACAC                                         |
| FLARE 9                                | Strand 1: UCAGCCCACAUACUUUGUUGAUGGUCAAGGACGGGUCCAGU                                         |
|                                        | Strand 2: ACUACUGUUGGUAGAGUGUGAGGUCCAUCAUCAUGGCAAGUGC                                       |
| FLARE 10                               | Strand 1: GCAGUCAGCCCACAUACUUUGUUGAUGGUCAAGGACGGGUCCAGU                                     |
|                                        | Strand 2: ACUACUGUUGGUAGAGUGUGAGGUCCAUCAUCAUGGCAAGUGCUUGG                                   |
| <b>Upper strands of FLARE:</b>         |                                                                                             |
| FLARE 1, 2, 3, & 6                     | UUGCCAUGUGUAUGUGGG                                                                          |
| FLARE 4 & 9                            | GCACUUGCCAUGUGUAUGUGGGCUGA                                                                  |
| FLARE 5 & 10                           | CCAAGCACUUGCCAUGUGUAUGUGGGCUGACUGC                                                          |
| FLARE 7                                | UUGCCAUGUGUAUGUGGGCUGACUGC                                                                  |
| FLARE 8                                | GUGUUGCCAUGUGUAUGUGGGUCC                                                                    |

| <b>Mismatches and modifications used in upper strand of FLARE 4</b> |                             |
|---------------------------------------------------------------------|-----------------------------|
| Upper strand FLARE 4                                                | GCACUUGCCAUGUGUAUGUGGGCUGA  |
| <b>Mismatches used:</b>                                             |                             |
| MM1                                                                 | GCACUUGCCUUGUGUAUGUGGGCUGA  |
| MM2                                                                 | GCACUUGCCACGUGUAUGUGGGCUGA  |
| MM3                                                                 | GCACUUGCCAUAUGUAUGUGGGCUGA  |
| MM4                                                                 | GCACUUGCCAUGUAUAUGUGGGCUGA  |
| MM5                                                                 | GCACUUGCCAUGUGCAUGUGGGCUGA  |
| MM6                                                                 | GCACUUGCCAUGUGUUUGUGGGCUGA  |
| <b>Nucleotide Modifications used:</b>                               |                             |
| Bulge U Deleted                                                     | GCACUUGCCAUG _GUAUGUGGGCUGA |
| Bulge A                                                             | GCACUUGCCAUGAGUAUGUGGGCUGA  |
| Bulge G                                                             | GCACUUGCCAUGGGUAUGUGGGCUGA  |
| Bulge C                                                             | GCACUUGCCAUGCGUAUGUGGGCUGA  |

| <b>Modification used in FLARE 4 keeping upper strand of FLARE 4 unchanged</b> |                                                                                       |
|-------------------------------------------------------------------------------|---------------------------------------------------------------------------------------|
| Mod 1                                                                         | UCAGCCCACAUACUUGUUGAAAGGACGGGUCCAGUAGUUCGCUACUGUUGAGUAGA<br>GUGUGAGUCAAUCAUGGCAAGUGC  |
| Mod 2                                                                         | UCAGCCCACAUACAUGUUGAAAGGACGGGUCCAGUAGUUCGCUACUGUUGAGUAG<br>AGUGUGAGUCAAUCAUGGCAAGUGC  |
| Mod 3                                                                         | UCAGCCCACAUACGUUGUUGAAAGGACGGGUCCAGUAGUUCGCUACUGUUGAGUAG<br>AGUGUGAGUCAAUCAUGGCAAGUGC |
| Mod 4                                                                         | UCAGCCCACAUACCUUGUUGAAAGGACGGGUCCAGUAGUUCGCUACUGUUGAGUAG<br>AGUGUGAGUCAAUCAUGGCAAGUGC |
| Mod 5                                                                         | UCAGCCCACAUACUCUGUUGAAAGGACGGGUCCAGUAGUUCGCUACUGUUGAGUAG<br>AGUGUGAGUCAAUCAUGGCAAGUGC |
| Mod 6                                                                         | UCAGCCCACAUACUAGUUGAAAGGACGGGUCCAGUAGUUCGCUACUGUUGAGUAG<br>AGUGUGAGUCAAUCAUGGCAAGUGC  |
| Mod 7                                                                         | UCAGCCCACAUACUUGGUUGAAAGGACGGGUCCAGUAGUUCGCUACUGUUGAGUAG<br>AGUGUGAGUCAAUCAUGGCAAGUGC |
| Mod 8                                                                         | UCAGCCCACAUACUGUUGAAAGGACGGGUCCAGUAGUUCGCUACUGUUGAGUAGAG<br>UGUGAGUCAAUCAUGGCAAGUGC   |
| Mod 9                                                                         | UCAGCCCACAUACUUUAUUGAAAGGACGGGUCCAGUAGUUCGCUACUGUUGAGUAG<br>AGUGUGAGUCAAUCAUGGCAAGUGC |
| Mod 10                                                                        | UCAGCCCACAUACUUUGUUGAAAGGACGGGUCCAGUAGUUCGCUACUGUUGAGUAG<br>AGUGUGAGUCAACCAUGGCAAGUGC |
| Mod 1.1                                                                       | UCAGCCCACAUACAUGUUGAAAGGACGGGUCCAGUAGUUCGCUACUGUUGAGUAGA<br>GUGUGAGUCAAUCAUGGCAAGUGC  |
| Mod 1.2                                                                       | UCAGCCCACAUACGUGUUGAAAGGACGGGUCCAGUAGUUCGCUACUGUUGAGUAGA<br>GUGUGAGUCAAUCAUGGCAAGUGC  |
| Mod 1.3                                                                       | UCAGCCCACAUACUAGUUGAAAGGACGGGUCCAGUAGUUCGCUACUGUUGAGUAGA<br>GUGUGAGUCAAUCAUGGCAAGUGC  |
| Mod 1.4                                                                       | UCAGCCCACAUACUGGUUGAAAGGACGGGUCCAGUAGUUCGCUACUGUUGAGUAGA<br>GUGUGAGUCAAUCAUGGCAAGUGC  |

| <b>Upper strand modifications for Mod 1</b> |                            |
|---------------------------------------------|----------------------------|
| Upper strand for Mod 1                      | GCACUUGCCAUGUGUAUGUGGGCUGA |
| Mod 1.5                                     | GCACUUGCCAUGAGUAUGUGGGCUGA |
| Mod 1.6                                     | GCACUUGCCAUGGGUAUGUGGGCUGA |
| Mod 1.7                                     | GCACUUGCCAUGCGUAUGUGGGCUGA |

| <b>Modification used in 5S FLARE main strand.</b>   |                                                                                         |
|-----------------------------------------------------|-----------------------------------------------------------------------------------------|
| 5S FLARE                                            | UCAGCCCACAAGCGUUCUUGAAAGGACGGGUCCAGUAGUUCGCUACUG<br>UUGAGUAGAGUGUGAGUCAAGUUCUGGCAAGUGC  |
| 5S-Mod 2                                            | UCAGCCCACAAGCGUUCUUGAAAGGACGGGUCCAGUAGUUCGCUACUG<br>UUGAGUAGAGUGUGAGUCAAGCUCUGGCAAGUGC  |
| 5S-Mod 3                                            | UCAGCCCACAAGCGUUCUUGAAAGGACGGGUCCAGUAGUUCGCUACUGU<br>UGAGUAGAGUGUGAGUCAAGUCUGGCAAGUGC   |
| 5S-Mod 4                                            | UCAGCCCACAAGCGUCUUGAAAGGACGGGUCCAGUAGUUCGCUACUGU<br>UGAGUAGAGUGUGAGUCAAGUUCUGGCAAGUGC   |
| 5S-Mod 5                                            | UCAGCCCACAAGCGCUUGAAAGGACGGGUCCAGUAGUUCGCUACUGUU<br>GAGUAGAGUGUGAGUCAAGUUCUGGCAAGUGC    |
| 5S-Mod 6                                            | UCAGCCCACAAGCCUUGAAAGGACGGGUCCAGUAGUUCGCUACUGUUG<br>AGUAGAGUGUGAGUCAAGUCUGGCAAGUGC      |
| 5S-Mod 11                                           | UCAGCCCACAAGCGUCUUGAAAGGACGGGUCCAGUAGUUCGCUACUGU<br>UGAGUAGAGUGUGAGUCAAGCUCUGGCAAGUGC   |
| 5S-Mod 12                                           | UCAGCCCACAAGCGCUUGAAAGGACGGGUCCAGUAGUUCGCUACUGUU<br>GAGUAGAGUGUGAGUCAAGCUCUGGCAAGUGC    |
| 5S-Mod 13                                           | UCAGCCCACAAGCGUUCUUGAAAGGACGGGUCCAGUAGUUCGCUACUG<br>UUGAGUAGAGUGUGAGUCAAGUCUCUGGCAAGUGC |
| <b>Upper strand modifications used in 5S-FLARE</b>  |                                                                                         |
| 5S-FLARE                                            | GCACUUGCCACAUAGCUGUGGGCUGA                                                              |
| 5S-Mod 1                                            | GCACUUGCCAGAUAGCUUGUGGGCUGA                                                             |
| <b>Upper strand modifications used for 5S-Mod 2</b> |                                                                                         |
| 5S-Mod 7                                            | GCACUUGCCAGAUUGCUUGUGGGCUGA                                                             |
| 5S-Mod 8                                            | GCACUUGCCAGAUGCUUGUGGGCUGA                                                              |
| 5S-Mod 9                                            | GCACUUGCCAGAAGCUUGUGGGCUGA                                                              |
| 5S-Mod 10                                           | GCACUUGCCAGAGCUUGUGGGCUGA                                                               |



| RNA used for 3WJ construction for UV-T <sub>m</sub> and thermal stability on 8M, 10 M UREA-PAGE gel electrophoresis |                      |
|---------------------------------------------------------------------------------------------------------------------|----------------------|
| <b>Phi29 3WJ</b>                                                                                                    |                      |
| Phi29 3WJ-S1                                                                                                        | CCCACAUACUUUGUUGAUCC |
| Phi29 3WJ-S2                                                                                                        | GGAUCAAUCAUGGCAA     |
| Phi29 3WJ-S3                                                                                                        | UUGCCAUGUGUAUGUGGG   |
| <b>5S rRNA 3WJ</b>                                                                                                  |                      |
| 5S rRNA 3WJ-S1                                                                                                      | CCCACAAGCGUUCUUGAUCC |
| 5S rRNA 3WJ-S2                                                                                                      | GGAUCAAGUUCUGGCAA    |
| 5S rRNA 3WJ-S3                                                                                                      | UUGCCACAUAGCUGUGGG   |
| <b>5S Mod 2 3WJ</b>                                                                                                 |                      |
| 5S Mod 2 3WJ-S1                                                                                                     | CCCACAAGCGUUCUUGAUCC |
| 5S Mod 2 3WJ-S2                                                                                                     | GGAUCAAGCUCUGGCAA    |
| 5S Mod 2 3WJ-S3                                                                                                     | UUGCCAGAUAGCUUGUGGG  |

| sgRNA sequence |                                                                                                                                                                               |
|----------------|-------------------------------------------------------------------------------------------------------------------------------------------------------------------------------|
| WT sgRNA       | GGAGCGCACCAUCUUCUUCAGUUUUAGAGCUAGAAAUAGCAAGUUA<br>AAUAAGGCUAGUCCGUUAUCAACUUGAAAAAGUGGCACCGAGUCGGU<br>GCUUUU                                                                   |
| 5S sgRNA       | GGAGCGCACCAUCUUCUUCAGUUUUAGAGCUAGAAAUAGCAAGUUA<br>AAUAAGGCUAGUCCGUUAUCAACUUGGCCACCAAGCGUUCUUGAUCC<br>UUUGGAUCAAGCUCUGGCAAUUUUUGCCAGAUAGCUUGUGGGCCAAG<br>UGGCACCGAGUCGGUGCUUUU |

| eGFP target dsDNA sequence obtained from plasmid PX552 showing target site in bold                                                                                                                                                                                                                                                                                                                                                                                                                                                                                                                                                                                                                                                                                                                    |
|-------------------------------------------------------------------------------------------------------------------------------------------------------------------------------------------------------------------------------------------------------------------------------------------------------------------------------------------------------------------------------------------------------------------------------------------------------------------------------------------------------------------------------------------------------------------------------------------------------------------------------------------------------------------------------------------------------------------------------------------------------------------------------------------------------|
| ATGGTGAGCAAGGGCGAGGAGCTGTTCACCGGGGTGGTGCCCATCCTGGTCGAGCTGGACG<br>GCGACGTAAACGGCCACAAGTTCAGCGTGTCCGGCGAGGGCGAGGGCGATGCCACCTACGG<br>CAAGCTGACCCTGAAGTTCATCTGCACCACCGGCAAGCTGCCCCGTGCCCTGGCCCACCCTC<br>GTGACCACCCTGACCTACGGCGTGCAGTGCTTCAGCCGCTACCCCGACCACATGAAGCAGC<br>ACGACTTCTTCAAGTCCGCCATGCCCCGAAGGCTACGTCC <b>GGAGCGCACCATCTTCTTCAA</b><br>GGACGACGGCAACTACAAGACCCGCGCCGAGGTGAAGTTCGAGGGCGACACCCTGGTGAAC<br>CGCATCGAGCTGAAGGGCATCGACTTCAAGGAGGACGGCAACATCCTGGGGCACAAGCTGG<br>AGTACAACACTACAACAGCCACAACGTCTATATCATGGCCGACAAGCAGAAGAACGGCATCAA<br>GGTGAACCTTCAAGATCCGCCACAACATCGAGGACGGCAGCGTGCAGCTCGCCGACCACTAC<br>CAGCAGAACACCCCCATCGGCGACGGCCCCGTGCTGCTGCCCCGACAACCACTACCTGAGCA<br>CCCAGTCCGCCCTGAGCAAAGACCCCAACGAGAAGCGCGATCACATGGTCCTGCTGGAGTT<br>CGTGACCGCCGCGGGATCACTCTCGGCATGGACGAGCTGTACAAG |

| <b>Strands used for nano-triangle construct (2' F modified)</b> |                                                                                             |
|-----------------------------------------------------------------|---------------------------------------------------------------------------------------------|
| 5S-Mod 2 Tr-A                                                   | GGAUCAAGCUCCGGGAAGAGCCUAUGCCCAUCCAGCGUUCUUGAUCC                                             |
| 5S-Mod 2 Tr-B                                                   | GGAUCAAGCUCCGUAUCACCAUGGGCAGUUGAGAGCGUUCUUGAUCC                                             |
| 5S-Mod 2 Tr-C                                                   | GGAUCAAGCUCCGGUAUUGGACGGCCUCGCAUGAGCGUUCUUGAUCC                                             |
| 5S-Mod 2 Tr-D                                                   | GCCGUCCAAUACCGGAUAGCUGGAUGGGCAUAGGCUCUCCCCGGAUA<br>GCUCUCAACUGCCCAUGGUGAUACGGAUAGCUCAUGCGAG |

| <b>RNAs used for 3WJ construction for UV-T<sub>m</sub> (to compare with FLARE Fluorescence)</b> |                      |
|-------------------------------------------------------------------------------------------------|----------------------|
| <b>Mod 1 3WJ</b>                                                                                |                      |
| Mod 1 3WJ-S1                                                                                    | CCCACAUACUUGUUGAUCC  |
| Mod 1 3WJ-S2                                                                                    | GGAUCAAUCAUGGCAA     |
| Mod 1 3WJ-S3                                                                                    | UUGCCAUGUGUAUGUGGG   |
| <b>Mod 2 3WJ</b>                                                                                |                      |
| Mod 2 3WJ-S1                                                                                    | CCCACAUACAUUGUUGAUCC |
| Mod 2 3WJ-S2                                                                                    | GGAUCAAUCAUGGCAA     |
| Mod 2 3WJ-S3                                                                                    | UUGCCAUGUGUAUGUGGG   |
| <b>Mod 3 3WJ</b>                                                                                |                      |
| Mod 3 3WJ-S1                                                                                    | CCCACAUACGUUGUUGAUCC |
| Mod 3 3WJ-S2                                                                                    | GGAUCAAUCAUGGCAA     |
| Mod 3 3WJ-S3                                                                                    | UUGCCAUGUGUAUGUGGG   |
| <b>Mod 4 3WJ</b>                                                                                |                      |
| Mod 4 3WJ-S1                                                                                    | CCCACAUACCUUGUUGAUCC |
| Mod 4 3WJ-S2                                                                                    | GGAUCAAUCAUGGCAA     |
| Mod 4 3WJ-S3                                                                                    | UUGCCAUGUGUAUGUGGG   |
| <b>Mod 5 3WJ</b>                                                                                |                      |
| Mod 5 3WJ-S1                                                                                    | CCCACAUACUCUGUUGAUCC |
| Mod 5 3WJ-S2                                                                                    | GGAUCAAUCAUGGCAA     |
| Mod 5 3WJ-S3                                                                                    | UUGCCAUGUGUAUGUGGG   |
| <b>Mod 6 3WJ</b>                                                                                |                      |
| Mod 6 3WJ-S1                                                                                    | CCCACAUACUUAGUUGAUCC |
| Mod 6 3WJ-S2                                                                                    | GGAUCAAUCAUGGCAA     |
| Mod 6 3WJ-S3                                                                                    | UUGCCAUGUGUAUGUGGG   |
| <b>Mod 7 3WJ</b>                                                                                |                      |
| Mod 7 3WJ-S1                                                                                    | CCCACAUACUUGGUUGAUCC |
| Mod 7 3WJ-S2                                                                                    | GGAUCAAUCAUGGCAA     |
| Mod 7 3WJ-S3                                                                                    | UUGCCAUGUGUAUGUGGG   |
| <b>Mod 8 3WJ</b>                                                                                |                      |
| Mod 8 3WJ-S1                                                                                    | CCCACAUACUGUUGAUCC   |
| Mod 8 3WJ-S2                                                                                    | GGAUCAAUCAUGGCAA     |
| Mod 8 3WJ-S3                                                                                    | UUGCCAUGUGUAUGUGGG   |

|                      |                      |
|----------------------|----------------------|
| <b>Mod 9 3WJ</b>     |                      |
| Mod 9 3WJ-S1         | CCCACAUACUUUAUUGAUCC |
| Mod 9 3WJ-S2         | GGAUCAAUCAUGGCAA     |
| Mod 9 3WJ-S3         | UUGCCAUGUGUAUGUGGG   |
| <b>Mod 10 3WJ</b>    |                      |
| Mod 10 3WJ-S1        | CCCACAUACUUUGUUGAUCC |
| Mod 10 3WJ-S2        | GGAUCAACCAUGGCAA     |
| Mod 10 3WJ-S3        | UUGCCAUGUGUAUGUGGG   |
| <b>Mod 1.1 3WJ</b>   |                      |
| Mod 1.1 3WJ-S1       | CCCACAUACAUGUUGAUCC  |
| Mod 1.1 3WJ-S2       | GGAUCAAUCAUGGCAA     |
| Mod 1.1 3WJ-S3       | UUGCCAUGUGUAUGUGGG   |
| <b>Mod 1.3 3WJ</b>   |                      |
| Mod 1.3 3WJ-S1       | CCCACAUACGUGUUGAUCC  |
| Mod 1.3 3WJ-S2       | GGAUCAAUCAUGGCAA     |
| Mod 1.3 3WJ-S3       | UUGCCAUGUGUAUGUGGG   |
| <b>5S Mod 1 3WJ</b>  |                      |
| 5S Mod 1 3WJ-S1      | CCCACAAGCGUUCUUGAUCC |
| 5S Mod 1 3WJ-S2      | GGAUCAAGUUCUGGCAA    |
| 5S Mod 1 3WJ-S3      | UUGCCAGAUAGCUUGUGGG  |
| <b>5S Mod 4 3WJ</b>  |                      |
| 5S Mod 4 3WJ-S1      | CCCACAAGCGUCUUGAUCC  |
| 5S Mod 4 3WJ-S2      | GGAUCAAGUUCUGGCAA    |
| 5S Mod 4 3WJ-S3      | UUGCCAGAUAGCUUGUGGG  |
| <b>5S Mod 5 3WJ</b>  |                      |
| 5S Mod 5 3WJ-S1      | CCCACAAGCGCUUGAUCC   |
| 5S Mod 5 3WJ-S2      | GGAUCAAGUUCUGGCAA    |
| 5S Mod 5 3WJ-S3      | UUGCCAGAUAGCUUGUGGG  |
| <b>5S Mod 11 3WJ</b> |                      |
| 5S Mod 11 3WJ-S1     | CCCACAAGCGUCUUGAUCC  |
| 5S Mod 11 3WJ-S2     | GGAUCAAGCUCUGGCAA    |
| 5S Mod 11 3WJ-S3     | UUGCCAGAUAGCUUGUGGG  |
| <b>5S Mod 12 3WJ</b> |                      |
| 5S Mod 12 3WJ-S1     | CCCACAAGCGCUUGAUCC   |
| 5S Mod 12 3WJ-S2     | GGAUCAAGCUCUGGCAA    |
| 5S Mod 12 3WJ-S3     | UUGCCAGAUAGCUUGUGGG  |

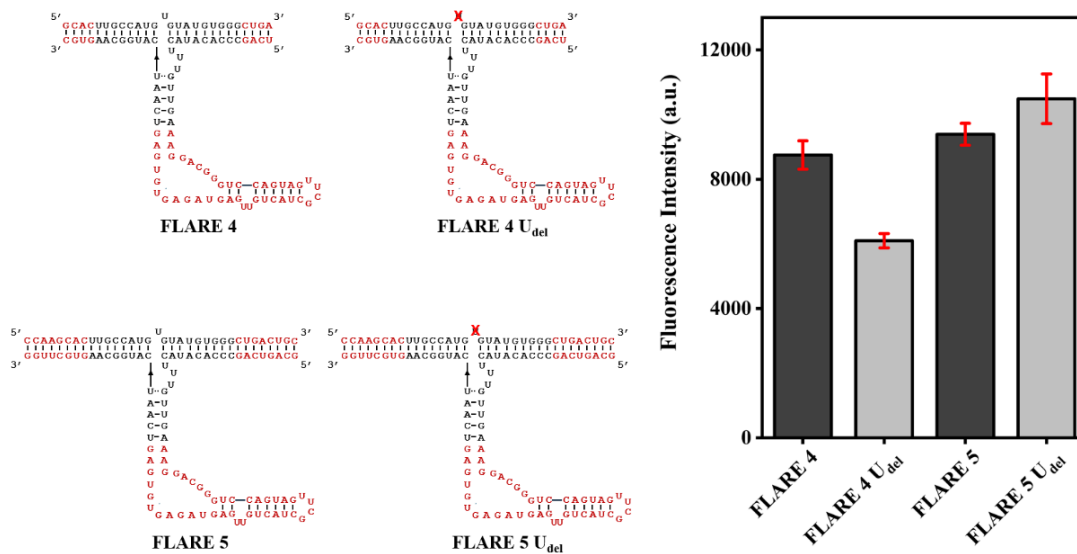

Figure S1: Fluorescence response of FLARE 4 and FLARE 5 using U-bulge deleted ( $U_{del}$ ) 3WJ. FLARE 4 exhibited a significant decrease in fluorescence intensity correlating with the literature findings.

Deletion of the U bulge in upper strand of the Phi29 3WJ destabilize the 3WJ.<sup>1-2</sup> Thus, FLARE 4 and FLARE 5 were compared to assess their functionality utilizing upper strand U-bulge deleted (U<sub>del</sub>) 3WJs.

**Figure S2: Thermal melting curves of wild-type and engineered phi29 3WJ**

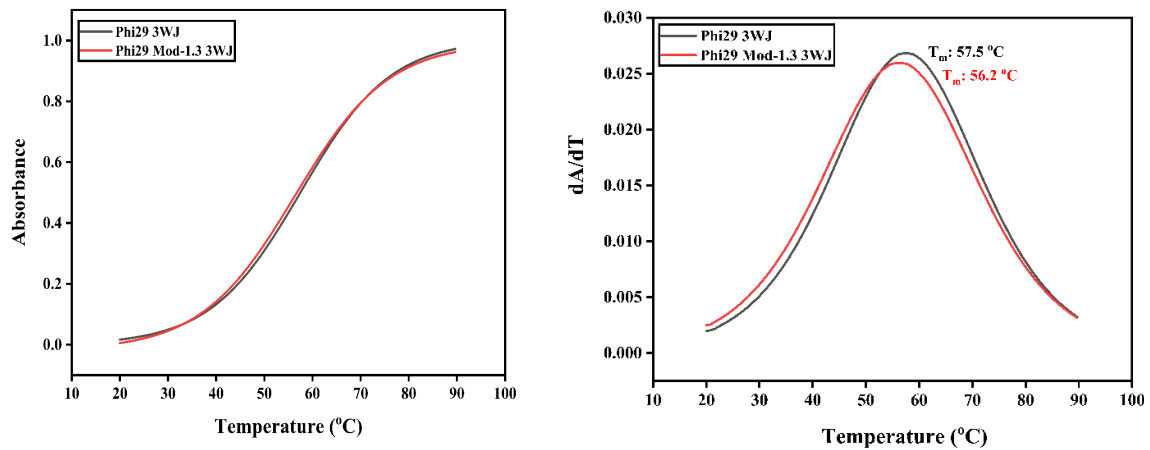

**Figure S2:** Sigmoidal and derivative curve showing UV melting temperatures of Phi29 3WJ and Phi29 Mod 1.3 3WJ

**Figure S3: Step-wise assembly of wild-type and engineered 3WJ's**

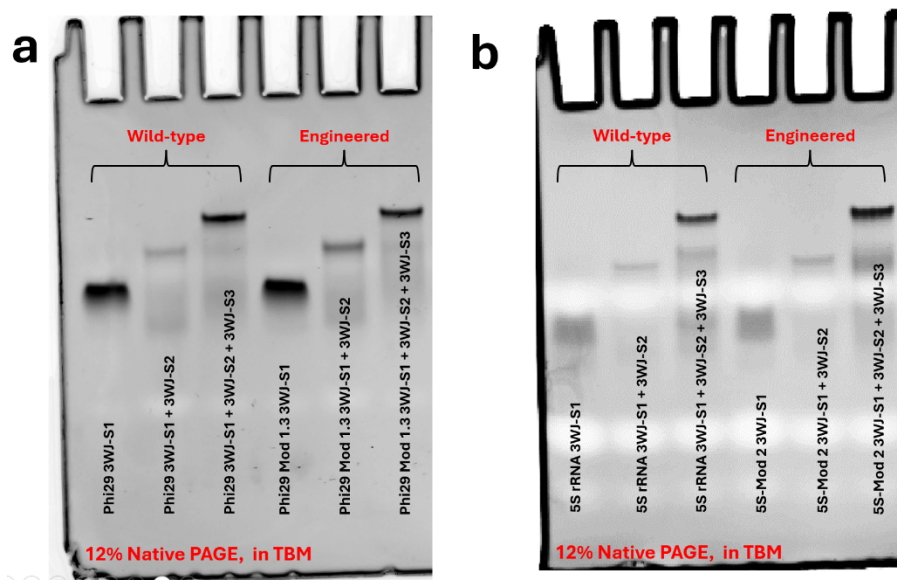

**Figure S3:** Step-wise assembly of Phi29 3WJ, Phi29 Mod 1.3 3WJ, 5S rRNA 3WJ and 5S-Mod 2 3WJ. Gels were run in TBM buffer on 12% polyacrylamide gel.

**Figure S4: Temperature dependent CD spectra of Phi29 3WJ, 5S rRNA 3WJ and engineered 5S Mod 2 3WJ**

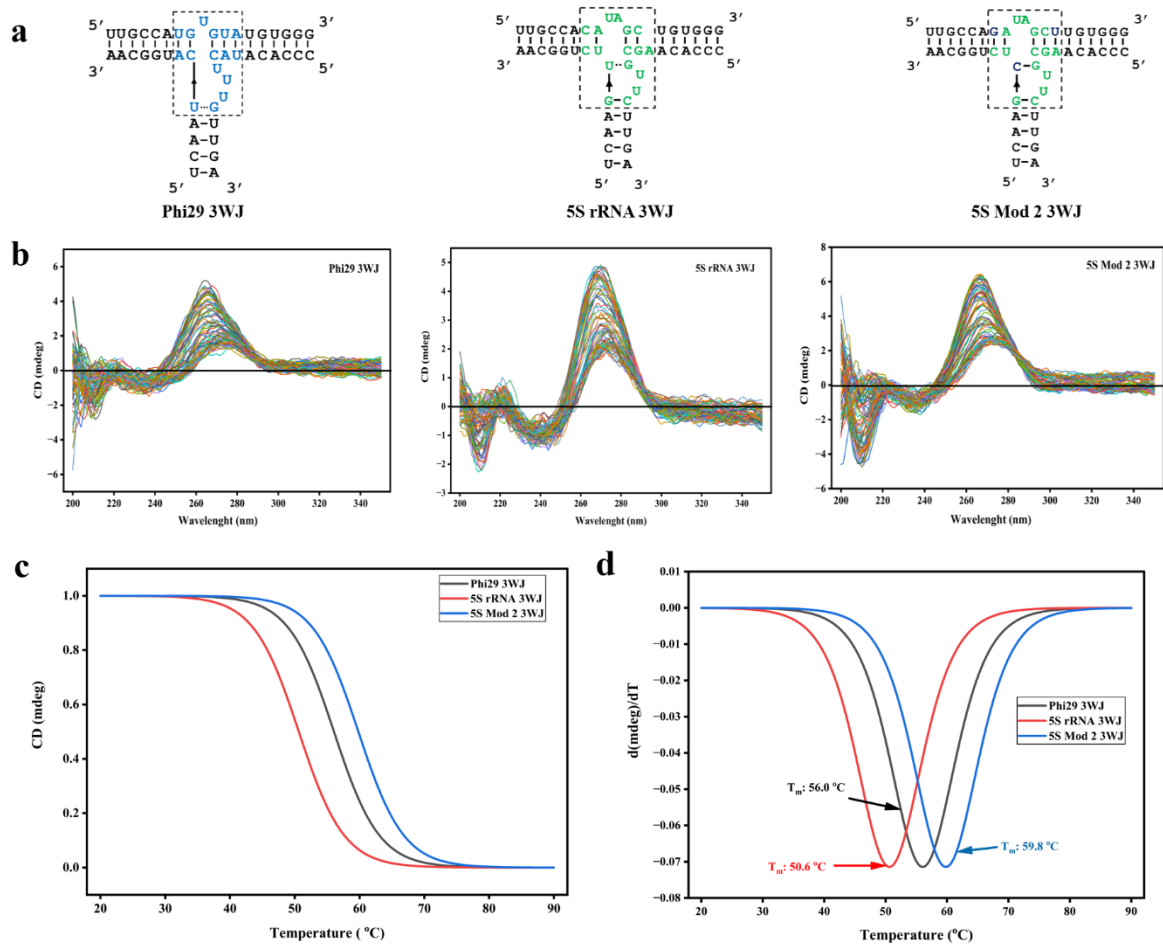

Figure S4: a) Sequence of Phi29 3WJ, 5S rRNA 3WJ and engineered 5S Mod 2 3WJ and b) their corresponding overlaid CD spectra obtained at different temperatures ranging from 20°C to 90°C showing a positive intense band around 265 nm and two negative bands around 240 nm and 210 nm indicative of an A-type helical structure c) CD thermal melting curves of Phi29 3WJ, 5S rRNA 3WJ and engineered 5S Mod 2 3WJ d) Derivative plots of CD melting curves Phi29 3WJ, 5S rRNA 3WJ and engineered 5S Mod 2 3WJ

**Figure S5: Thermal melting curves of engineered Phi29 3WJ and engineered 5S rRNA 3WJ**

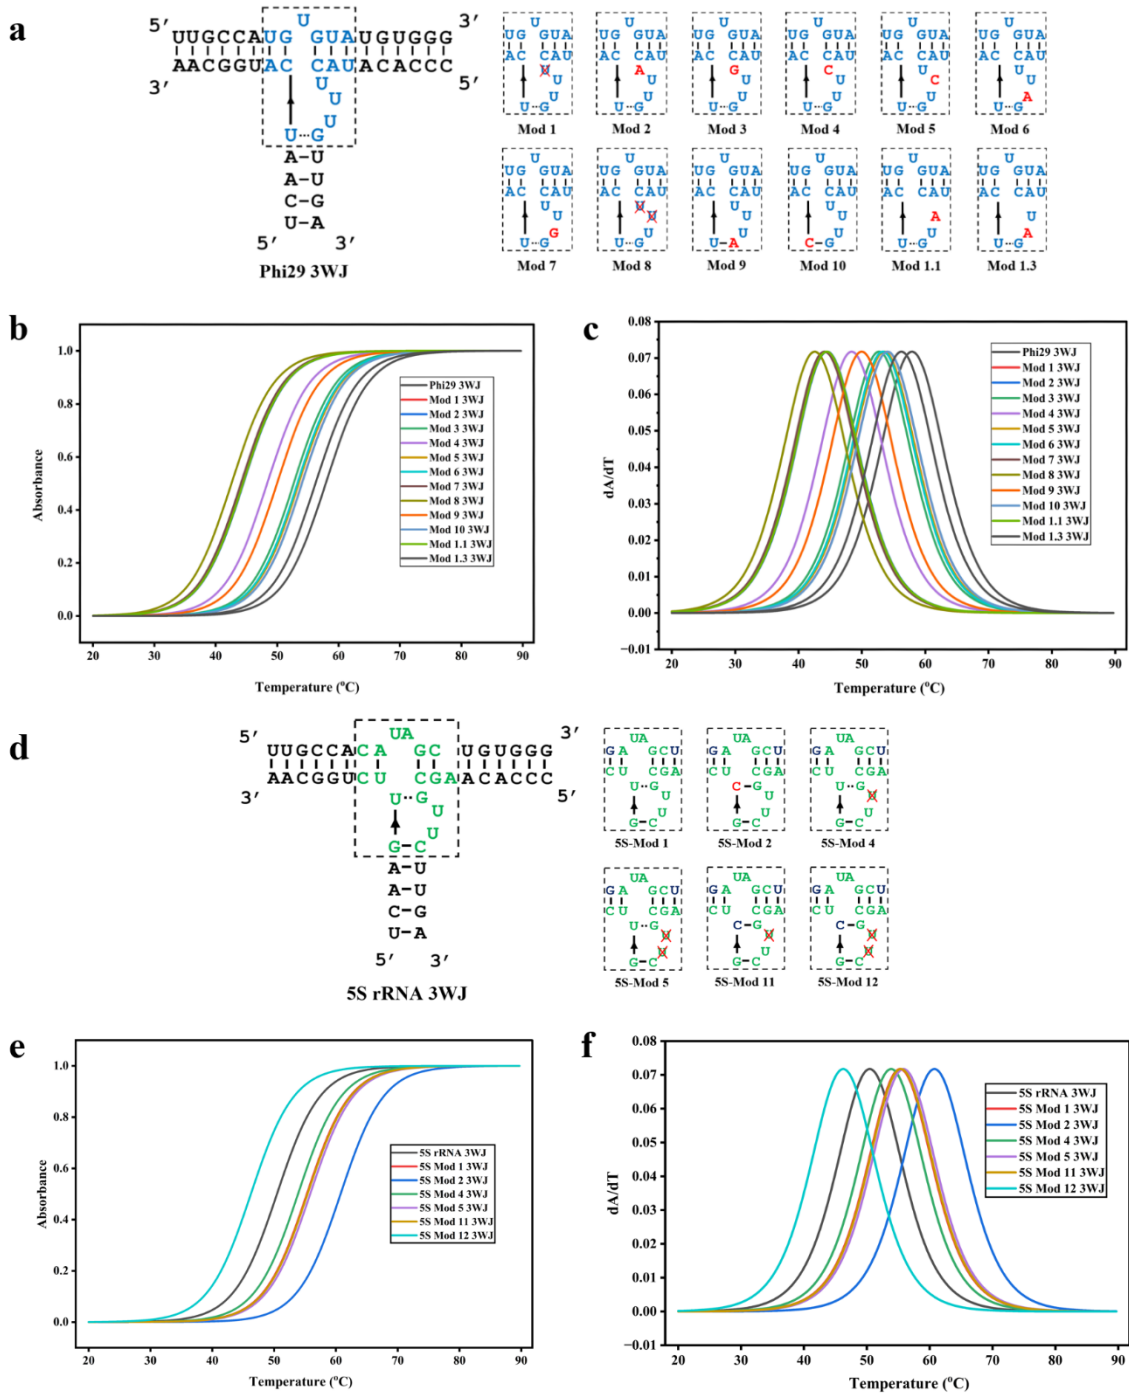

Figure S5: a) Sequences of isolated Phi29 3WJ and its modified constructs. b) & c) UV melting profiles showing sigmoidal and corresponding derivative curves, respectively of all the Phi29 3WJ constructs. d) Sequences of isolated 5S rRNA 3WJ and its modified constructs. e) & f) UV melting profiles showing sigmoidal and corresponding derivative curves, respectively of all the 5S rRNA 3WJ constructs.

**Table 1: Head-to-head comparison of Fluorescence fold vs UV-T<sub>m</sub> of selected 3WJs**

| S/N            | Modification | FLARE<br>Fluorescence fold<br>(descending<br>order) | UV-T <sub>m</sub> (°C) of<br>isolated 3WJs |
|----------------|--------------|-----------------------------------------------------|--------------------------------------------|
| <b>Phi29</b>   |              |                                                     |                                            |
| 1              | Phi29        | 9.6                                                 | 57.5 ± 0.7                                 |
| 2              | Mod 1.3      | 8.9                                                 | 56.2 ± 0.7                                 |
| 3              | Mod 1        | 8.8                                                 | 54 ± 0.6                                   |
| 4              | Mod 5        | 8.4                                                 | 53.5 ± 0.7                                 |
| 5              | Mod 3        | 7.8                                                 | 52.6 ± 0.7                                 |
| 6              | Mod 10       | 7.7                                                 | 54 ± 0.5                                   |
| 7              | Mod 6        | 6.3                                                 | 53.2 ± 0.7                                 |
| 8              | Mod 4        | 3.2                                                 | 48.3 ± 1.1                                 |
| 9              | Mod 9        | 3.2                                                 | 49.9 ± 0.5                                 |
| 10             | Mod 7        | 1.8                                                 | 44 ± 1.2                                   |
| 11             | Mod 2        | 1.5                                                 | 44 ± 0.6                                   |
| 12             | Mod 8        | 1.3                                                 | 42.5 ± 1.2                                 |
| 13             | Mod 1.1      | 1.1                                                 | 44.4 ± 0.7                                 |
| <b>5S rRNA</b> |              |                                                     |                                            |
| 14             | 5S Mod 2     | 10.1                                                | 60.8 ± 0.6                                 |
| 15             | 5S Mod 11    | 7.5                                                 | 55.4 ± 0.7                                 |
| 16             | 5S Mod 5     | 6.1                                                 | 55.8 ± 0.6                                 |
| 17             | 5S Mod 4     | 4.8                                                 | 53.8 ± 0.8                                 |
| 18             | 5S Mod 12    | 2.4                                                 | 46 ± 0.6                                   |
| 19             | 5S Mod 1     | 2.2                                                 | 55.2 ± 0.7                                 |
| 20             | 5S rRNA      | 1.8                                                 | 50.4 ± 0.7                                 |



**Figure S6: 8M and 10M urea stability of wild-type and engineered 3WJ's**

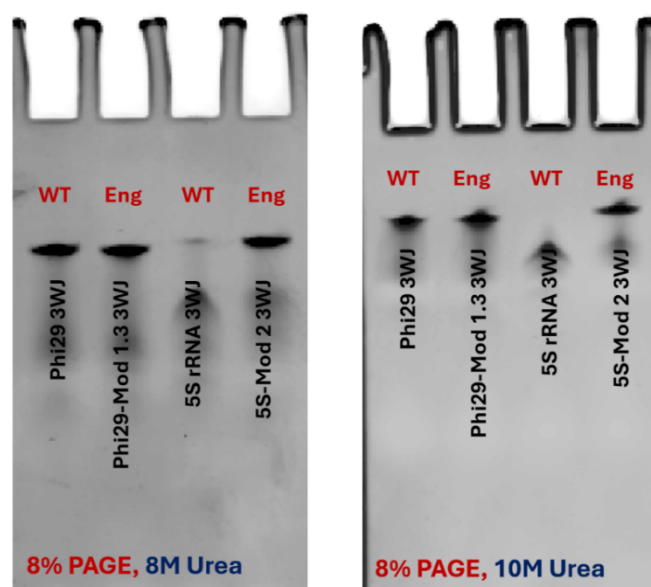

**Figure S6:** 8M and 10M Urea denaturation gel of Phi29 3WJ, Phi29 Mod 1.3 3WJ, 5S rRNA 3WJ and 5S-Mod 2 3WJ

**Figure S7: Secondary structure prediction and thermodynamic parameters of WT sgRNA and 5S sgRNA**

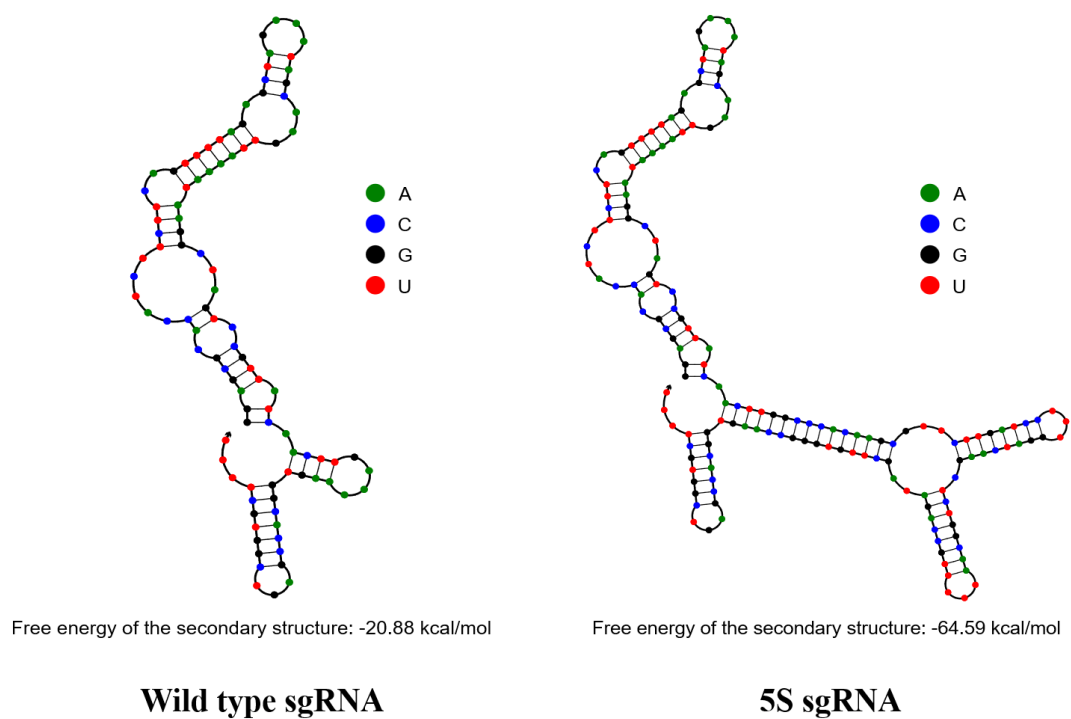

Figure S7: Secondary structure prediction and minimum free energy of WT sgRNA and 5S sgRNA using NUPACK webtool for predicting RNA folding.

**Figure S8: To determine hydrodynamic size of the engineered 5S triangle.**

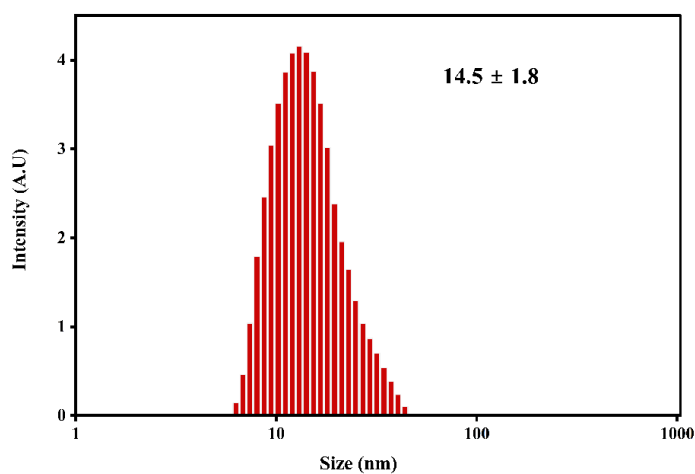

Figure S8: DLS graph showing the size distribution of engineered 5S triangle.

**Figure S9: To calculate loading efficiency of doxorubicin on the engineered 5S triangle**

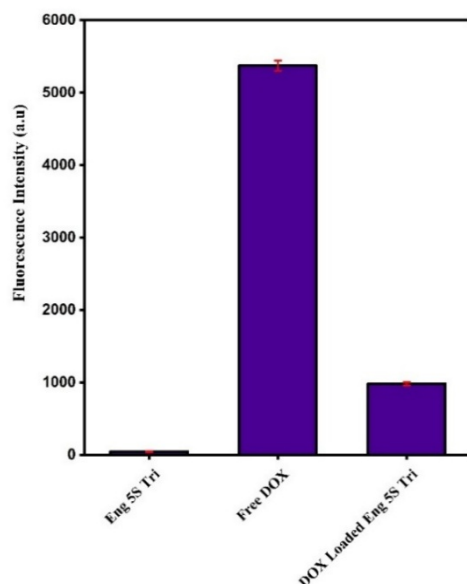

Figure S9: Bar graph showing fluorescence intensities of engineered 5S triangle, Free doxorubicin and doxorubicin loaded engineered 5S triangle.

$$\text{Loading efficiency} = \frac{\text{FI of free dox} - \text{FI of dox loaded Eng 5S tri}}{\text{FI of free dox}} * 100$$

**Figure S10: Schematic representation 5S sgRNA**

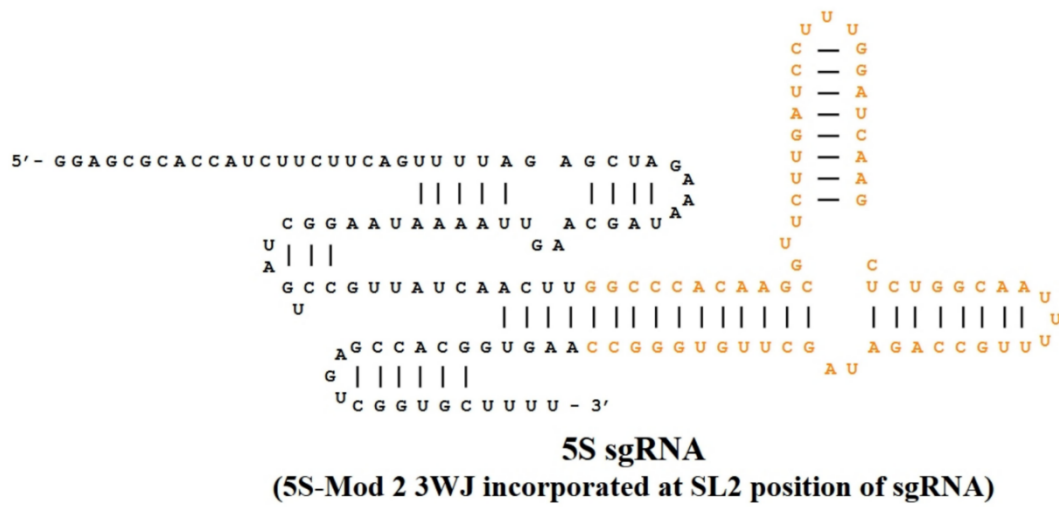

**Figure S10:** 5S sgRNA nucleotide sequence, orange colour indicates closed 5S-Mod 2 3WJ region at SL2 position of sgRNA

**Figure S11: Schematic representation of engineered 5S triangle**

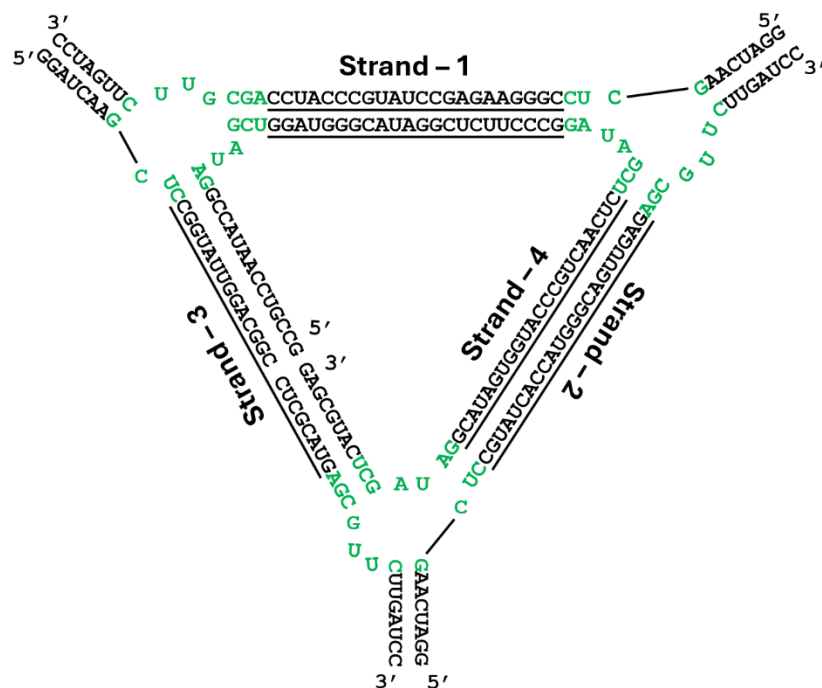

**Figure S11:** Engineered 5S triangle illustration showing all the sequence detail, highlighting the engineered 5S-core nucleotide sequence in green.

1. Hill, A. C.; Schroeder, S. J., Thermodynamic stabilities of three-way junction nanomotifs in prohead RNA. *RNA* **2017**, *23*(4), 521-529.
2. Shu, D.; Shu, Y.; Haque, F.; Abdelmawla, S.; Guo, P., Thermodynamically stable RNA three-way junction for constructing multifunctional nanoparticles for delivery of therapeutics. *Nature nanotechnology* **2011**, *6*(10), 658-667.
